# Supplementary material for: Niclosamide Inhibits Oxaliplatin Neurotoxicity while Improving Colorectal Cancer Therapeutic Response
Source: Oxford University Press journal article supplement (doi:10.1158/1535-7163.mct-16-0326), 2016-12-15
Supplement: 15357163mct160326-sup-166736_1_supp_3708270_5f8vmm.docx [file 15357163mct160326-sup-166736_1_supp_3708270_5f8vmm.docx]

**Supplementary Table S1.** Comparison of neuromuscular excitability parameters.Derived excitability parameters (means ± SD) from plantar muscle recordings in response to motor sciatic nerve stimulation of mice treated for 5 weeks with vehicle (n = 6), oxaliplatin (n = 7), oxaliplatin plus niclosamide (n = 9) or niclosamide alone (n = 7). Each group was compared to animals injected with vehicle, and differences were considered significant when *P* < 0.05 (highlighted in grey). Note that, when compared to vehicle-treated mice, all the parameters modified in oxaliplatin-injected mice remain constant when oxaliplatin plus niclosamide or niclosamide alone was administered.

| **Curve1** | **Number and name of derived excitability** | | **Vehicle** | **Oxaliplatin** | **Oxaliplatin +** | **Niclosamide** |
| --- | --- | --- | --- | --- | --- | --- |
|  | **parameters2** | |  |  | **Niclosamide** |  |
| **C1** | **06.** | Peak response (mV) | 2.79 ± 1.25 | 5.28 ± 1.14* | 3.69 ± 1.41 | 3.07 ± 1.29 |
| **19.** | Latency (ms) | 3.27 ± 0.12 | 3.13 ± 0.17 | 3.03 ± 0.18 | 3.22 ± 0.13 |
| **01.** | Stimulus (mA) for 50% max response | 0.25 ± 1.12 | 0.19 ± 1.03* | 0.21 ± 1.06 | 0.22 ± 1.13 |
| **05.** | Stimulus-response slope | 2.78 ± 1.35 | 3.61 ± 1.27 | 2.88 ± 1.26 | 3.10 ± 1.21 |
| **C2** | **03.** | Chronaxie (ms) | 0.36 ± 0.05 | 0.39 ± 0.06 | 0.37 ± 0.07 | 0.30 ± 0.03 |
| **04.** | Rheobase (mA) | 0.15 ± 1.10 | 0.19 ± 1.07 | 0.14 ± 1.06 | 0.16 ± 1.07 |
| **C3** | **07.** | Resting slope | 0.86 ± 0.04 | 0.85 ± 0.03 | 1.14 ± 0.19 | 1.56 ± 0.64 |
| **08.** | Minimum slope | 0.39 ± 0.03 | 0.30 ± 0.02* | 0.47 ± 0.10 | 0.41 ± 0.07 |
| **28.** | Hyperpolarizing slope | 0.93 ± 0.06 | 0.49 ± 0.06*** | 0.81 ± 0.17 | 1.07 ± 0.26 |
| **C4** | **12.** | TEd (10-20 ms) / 40% | 45.19 ± 2.20 | 48.71 ± 1.79 | 45.59 ± 2.45 | 42.99 ± 2.55 |
| **25.** | TEd (peak) / 40% | 45.67 ± 2.13 | 49.71 ± 1.72 | 45.77 ± 2.35 | 43.16 ± 2.40 |
| **20.** | TEd (40-60 ms) / 40% | 36.30 ± 2.43 | 37.62 ± 1.70 | 34.69 ± 2.24 | 33.43 ± 1.75 |
| **21.** | TEd (90-100 ms) / 40% | 34.52 ± 2.25 | 34.43 ± 1.52 | 31.03 ± 2.19 | 30.92 ± 1.50 |
| **23.** | TEd (undershoot) / 40% | -11.40 ± 0.70 | -10.68 ± 1.40 | -12.49 ± 1.09 | -10.63 ± 1.44 |
| **22.** | TEh (10-20 ms) / -40% | -67.71 ± 2.66 | -78.93 ± 3.35* | -69.67 ± 4.01 | -65.55 ± 1.68 |
| **30.** | TEh (20-40 ms) / -40% | -80.30 ± 2.85 | -92.45 ± 3.70* | -81.80 ± 5.72 | -78.61 ± 1.33 |
| **11.** | TEh (90-100 ms) / -40% | -91.98 ± 4.26 | -111.50 ± 9.20* | -89.44 ± 8.81 | -95.12 ± 2.21 |
| **24.** | TEh (overshoot) / -40% | 7.58 ± 0.93 | 10.01 ± 0.79 | 9.94 ± 0.99 | 8.99 ± 1.08 |
| **C5** | **32.** | Refractoriness at 2 ms (%) | 31.10 ± 5.83 | 48.49 ± 5.05* | 22.76 ± 14.10 | 25.87 ± 2.89 |
| **29.** | Refractoriness at 2.5 ms (%) | 15.31 ± 6.80 | 30.15 ± 6.81 | 15.25 ± 7.26 | 7.02 ± 3.98 |
| **34.** | Superexcitability at 5 ms (%) | -6.57 ± 1.96 | -1.31 ± 1.75* | -2.71 ± 3.06 | -8.51 ± 0.85 |
| **33.** | Superexcitability at 7 ms (%) | -5.10 ± 1.39 | -0.78 ± 1.61* | -3.65 ± 2.93 | -6.32 ± 1.06 |
| **14.** | Subexcitability (%) | 6.52 ± 1.03 | 6.34 ± 0.36 | 5.80 ± 0.94 | 7.76 ± 0.68 |

1C1: stimulus-response relationship, C2: strength-duration relationship, C3: current-threshold relationship, C4: threshold electrotonus, and C5: recovery cycle. 2TEd: threshold electrotonus from depolarizing currents (40%), TEh: threshold electrotonus from hyperpolarizing currents (-40%). * : 0.01 < *P* < 0.05 and *** : *P* < 0.001 *versus* vehicle.
