# Supplementary material for: Niclosamide Inhibits Oxaliplatin Neurotoxicity while Improving Colorectal Cancer Therapeutic Response
Source: Oxford University Press journal article supplement (doi:10.1158/1535-7163.mct-16-0326), 2016-12-15
Supplement: 15357163mct160326-sup-166736_1_supp_3708271_lf8vmm.docx [file 15357163mct160326-sup-166736_1_supp_3708271_lf8vmm.docx]

**Supplementary Table S2.** Comparison of morphometric parameters.Mean values ± SD of morphometric parameters of single myelinated axons isolated from sciatic nerves of mice injected with vehicle, oxaliplatin, oxaliplatin plus niclosamide or niclosamide alone, for 5 weeks (271-319 axons from 4 different mice under each condition).

| **Morphometric parameters** | **Vehicle** | **Oxaliplatin** | **Oxaliplatin +** | **Niclosamide** |
| --- | --- | --- | --- | --- |
|  |  |  | **Niclosamide** |  |
| Internodal diameter (Di, in µm) | 10.32 ± 3.21 | 7.94 ± 2.25 *** | 9.90 ± 2.89 | 10.97 ± 1.03 |
| Nodal diameter (D, in µm) | 2.20 ± 0.44 | 2.63 ± 0.28 *** | 2.43 ± 0.41 | 2.38 ± 0.64 |
| Nodal length (L, in µm) | 0.84 ± 0.34 | 1.46 ± 0.49 *** | 0.88 ± 0.49 | 0.83 ± 0.54 |
| Nodal volume (V, in µm3) | 9.01 ± 3.38 | 16.24 ± 3.15 *** | 8.89 ± 2.35 | 9.32 ± 2.93 |
| D/Di | 0.29 ± 0.07 | 0.36 ± 0.10 *** | 0.24 ± 0.08 | 0.28 ± 0.06 |
| L/Di | 0.12 ± 0.04 | 0.22 ± 0.07 *** | 0.10 ± 0.04 | 0.12 ± 0.04 |
| V/Di | 0.57 ± 0.15 | 1.55 ± 0.11 *** | 0.60 ± 0.08 | 0.59 ± 0.08 |

*** : *P* < 0.001 *versus* vehicle.
